# Supplementary material
Source: PubMed Central journal article supplement (PMC4431949)
Supplement: NIHMS679562-supplement-1.pdf [file NIHMS679562-supplement-1.pdf]

## **SUPPLEMENTAL INFORMATION**

### **Antisense RNA Controls LRP1 Sense Transcript Expression Through Interaction With a Chromatin-Associated Protein, HMGB2**

Yasunari Yamanaka, Mohammad Ali Faghihi, Marco Magistri, Oscar Alvarez-  
Garcia, Martin Lotz and Claes Wahlestedt\*

\*Correspondence: [cwahlestedt@med.miami.edu](mailto:cwahlestedt@med.miami.edu)

## Figure S1

(Related to Figure 1)

**A)**

Mouse *Lrp1*-AS

CCTTCATTCTCCAGAGAACTAACTATAGAACAGCAGCCCCTGTGCAG |  
CACGAGAGGGGATCTGCACCCAGCCATGCGTGAGTCCAGCCTGTGACA  
CCCTTCTCACGCTTAGACAGCAAAGTTGCCTCGGAAGAGAAGAGAAGC  
CTGCATGGGAATGGCCAGCACATCCTAAATGCTCCAGTGGCCCGTGGTT  
CGTCCCTTCGTCTCATTGACTGCCACAGACAGGAAGTAGGCTCAGGGAC  
TTGGCACCTACCCAACAGCAGGACGTCCCTTTCTGGCCATACTCCTGAGG  
GTAACAAAATCACATGGAAGCCCAAAGCAAGCCAGGCTCAGGCTCCTCT  
GCCCTCTGCTACTTAACAATGTCCGTCCTTCCCCAGCCCCCCTGCAGAT  
GCTTCTGTATGGGAAAGCCCCTCTGCATCTAATGACACTCTGCTTTCAA  
GACGGGACAGTCCCTGGTCTCTGGAGAGTGACCATTCGTGGCCTTCTCA  
GTTGACACTTCTCCGCTGAGGCATCCCTTAGCCCTGAACCAGAAATGAAA  
GAGCCGGCTCAGAGTGAAAAGGAAGAATAGCCATCAATCTGCTCCTGTG  
TGCAAGGAGCACAGACCTGGTCTCAGACTCTGCCGTCTCCCCCGCTTC  
CCTGCCCTCTGAGTGACTCACGGTGCAGGCTGAGGGAGATGTTGATGGT  
ATGCTCATCCACAAAGCCCTTCAGGCCAGGCATCCGGGCACACTTGAGC  
TGTGTCTGGGCAGCACTGTCCCCAACGTGCACCCAGCATACTGGTCTCAT  
TGGCATAACTGAAGTCCATGGCCGTGGTTTGTCCGGTGCTGGTGGGTGT  
GATGGTAGACACTTGGGCCCACTCAGGTACGTAGCTAGGATGTTCTGA  
GAGTTGGCAATCAGTAGCACTGGCGGCCGATCTACTGGCTCTGGGGATG  
GGACAGAGAAAGGGCAGTTGGGACTTGTAACCGTTGAGGCGACTATTCA  
CTGGGGAGCCGCATTGCAGGTCCCCGGCTCTGTGGTCACTGGCAGACC  
CACTCACCACTTGGCCTTGCCAGGAGCGGTTGTCCGGTTGCAGCAGGT  
AGCCTTCAACACAGCCACATGTGAAGGAGCCATCTGTGTTGGTGCAAAG  
CTGGCTGCAGGTGCCATACACGGAACACTCGTCAAATCTGCCAGAGA  
GAAAAGGAAGAGGAGATGTTCACTTAGTGTAGCACAGGTGCCCCGAGA  
CACCAGCAGACAACCTGGCGGAATCGATTACAGTTCAGAAGGTGCAAACC  
CACTGCCCGGCAAACAGTTTTGGGATTTCTGGGTCATGCGCACTGACA  
GTGATTTGGAAAACATTTCTTGGATAACAGATGGGGCAGGTAGAGAATAC  
AATGATGAATTTGAAA

Human *LRP1*-AS

TGCACCCCTGCTGCATGAGGCTCAGCCCCAGGGTCCAACAGAGGTCA  
CAGTCACAGCACAGAATGGAAGGCTTGCAAGGAGGGCTGCCCTGGAGG  
GCAGAGTGAAAGCAGGGGAAAGCTGCAGCCTTTCTTCTTCGTCTCCT  
GGGGAGCTAATTACAGGCCAGCAGCCACTGTGCAG |  
GAGCGTTATCCGGCTGCAGGAGGTATCCTTCAACACAGCCACATATGA  
AGGAGCCGTCTGTGTTGGTGCATAGCTGGCTGCAGGTGCCGTACTGA

GCACTCATCAAATCTGCCGAGGAAAGGGCAAGAATGTGGTCATTTCCA  
 GTGTGACAAGGGCAACGAAGTGGGTGATCATCAGACATGATCAACATGT  
 CCATCCTTACAGCTACCTTGAAGGACAGTTCGGCAGAATCTATTACAGCA  
 TGAATGTGCAAACCTTAACACCCAGCAAGTCCAGTCTTGGAATCCACTC  
 TAGAGAAACACTCGTGTACATATCACTCATCCACGCAGGGAAGATTTATT  
 GAGTCCCTACTATGGGTGAGGTGCCAGGGGTGCATCAGTGAACCTTAAA  
 ATAGACCCACATTGCTGTCTCATGAACTTATATTCAGATAATAAATGAA  
 ATATAGTTACTATAATAA

**B)**

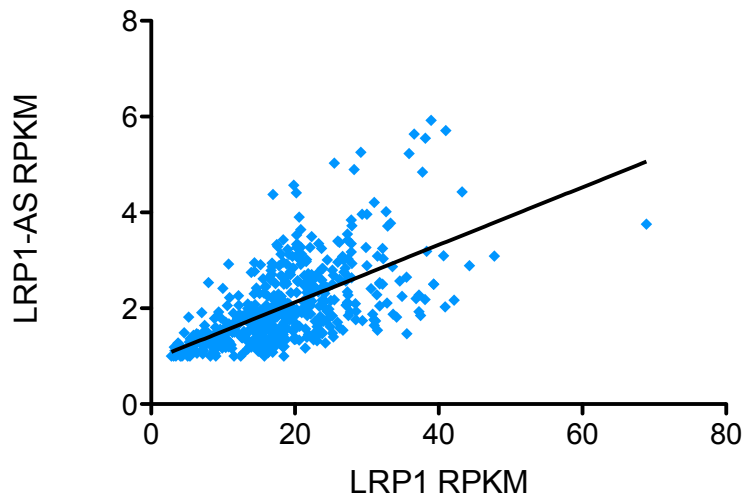

|                                              |                  |
|----------------------------------------------|------------------|
| Pearson r                                    | 0.6115           |
| 95% confidence interval                      | 0.5549 to 0.6625 |
| P value (two-tailed)                         | < 0.0001         |
| P value summary                              | ****             |
| Is the correlation significant? (alpha=0.05) | Yes              |
| R square                                     | 0.3740           |

**Figure S1.**

**A)** Sequences of mouse *Lrp1*-AS and human *LRP1*-AS. The potential overlap regions with mouse *Lrp1* or human *LRP1* are highlighted in red.

**B)** Expression correlation of *LRP1* and *LRP1*-AS in the developing human brain. Expression correlation analysis of *LRP1* and *LRP1*-AS in RNAseq data from the Developmental Transcriptome project of the BrainSpan atlas.

Figure S2

A

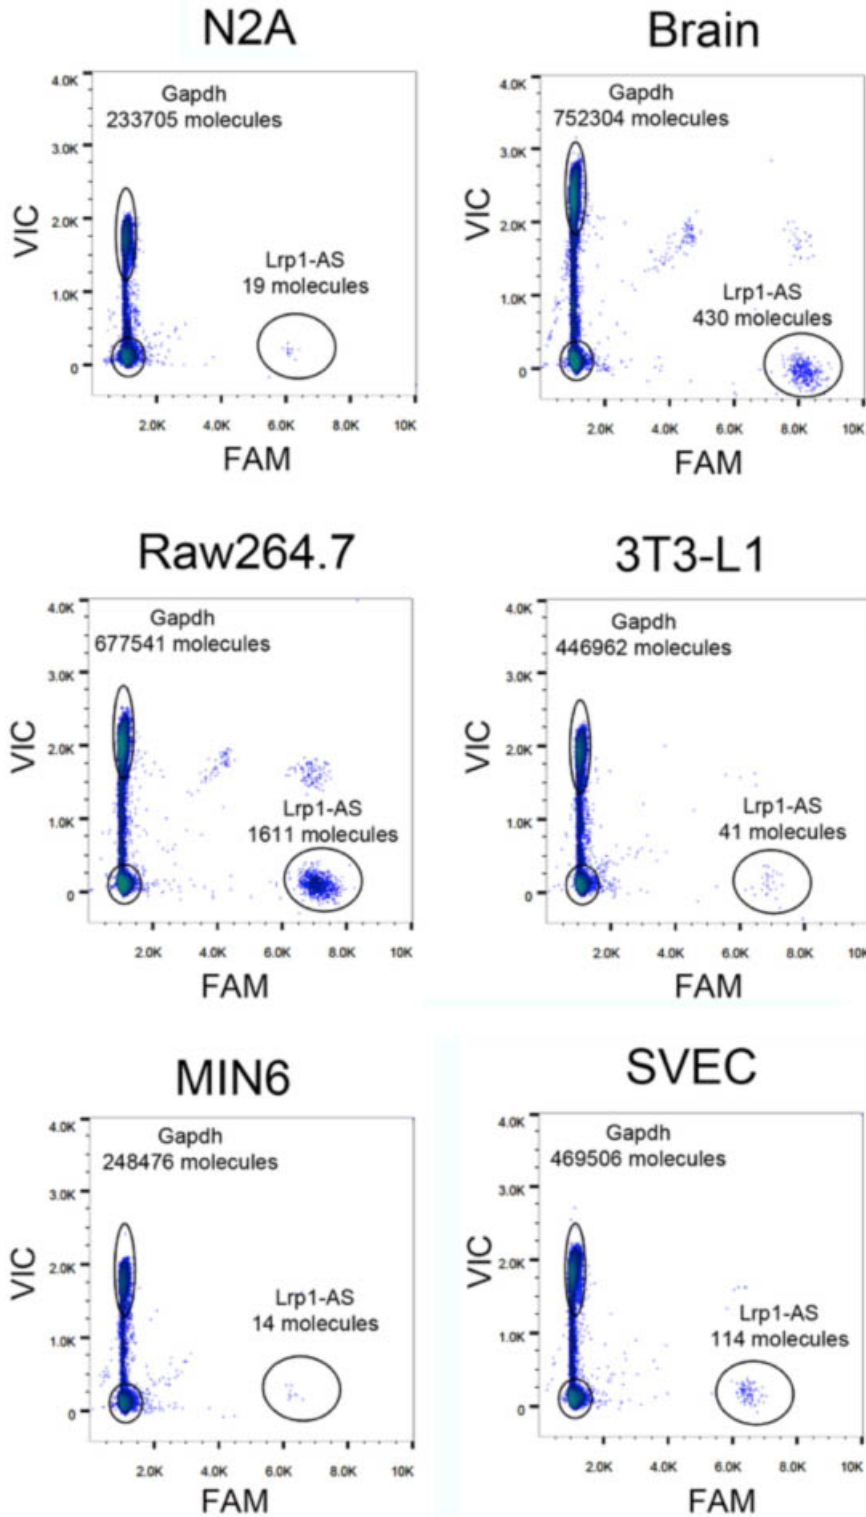

**B**

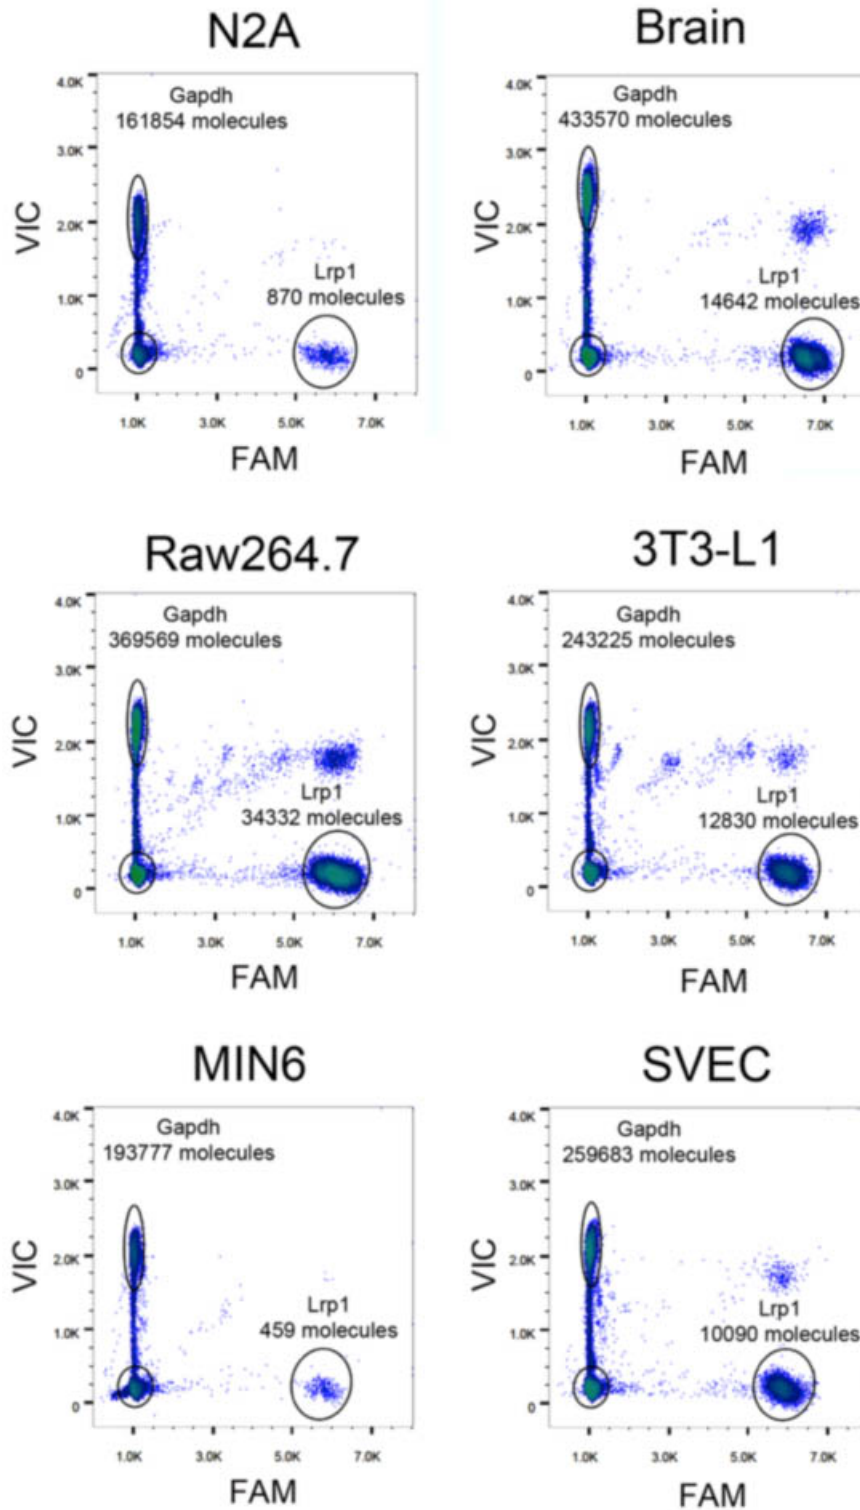

**Figure S2. Lrp1-AS and Lrp1 expression in mouse cell lines.**

A) Digital PCR (dPCR) analysis of FAM-labeled Lrp1-AS and VIC-labeled Gapdh expression in mouse brain tissue and different mouse cell lines. N2A neuroblastoma, Raw264.7 macrophages, 3T3-L1 embryonic fibroblast, MIN6 pancreatic beta cells, SVEC endothelial.

B) Digital PCR (dPCR) analysis of FAM-labeled Lrp1 and VIC-labeled Gapdh expression in mouse brain tissue and different mouse cell lines. N2A neuroblastoma, Raw264.7 macrophages, 3T3-L1 embryonic fibroblast, MIN6 pancreatic beta cells, SVEC endothelial.

# Figure S3

(Related to Figure 3)

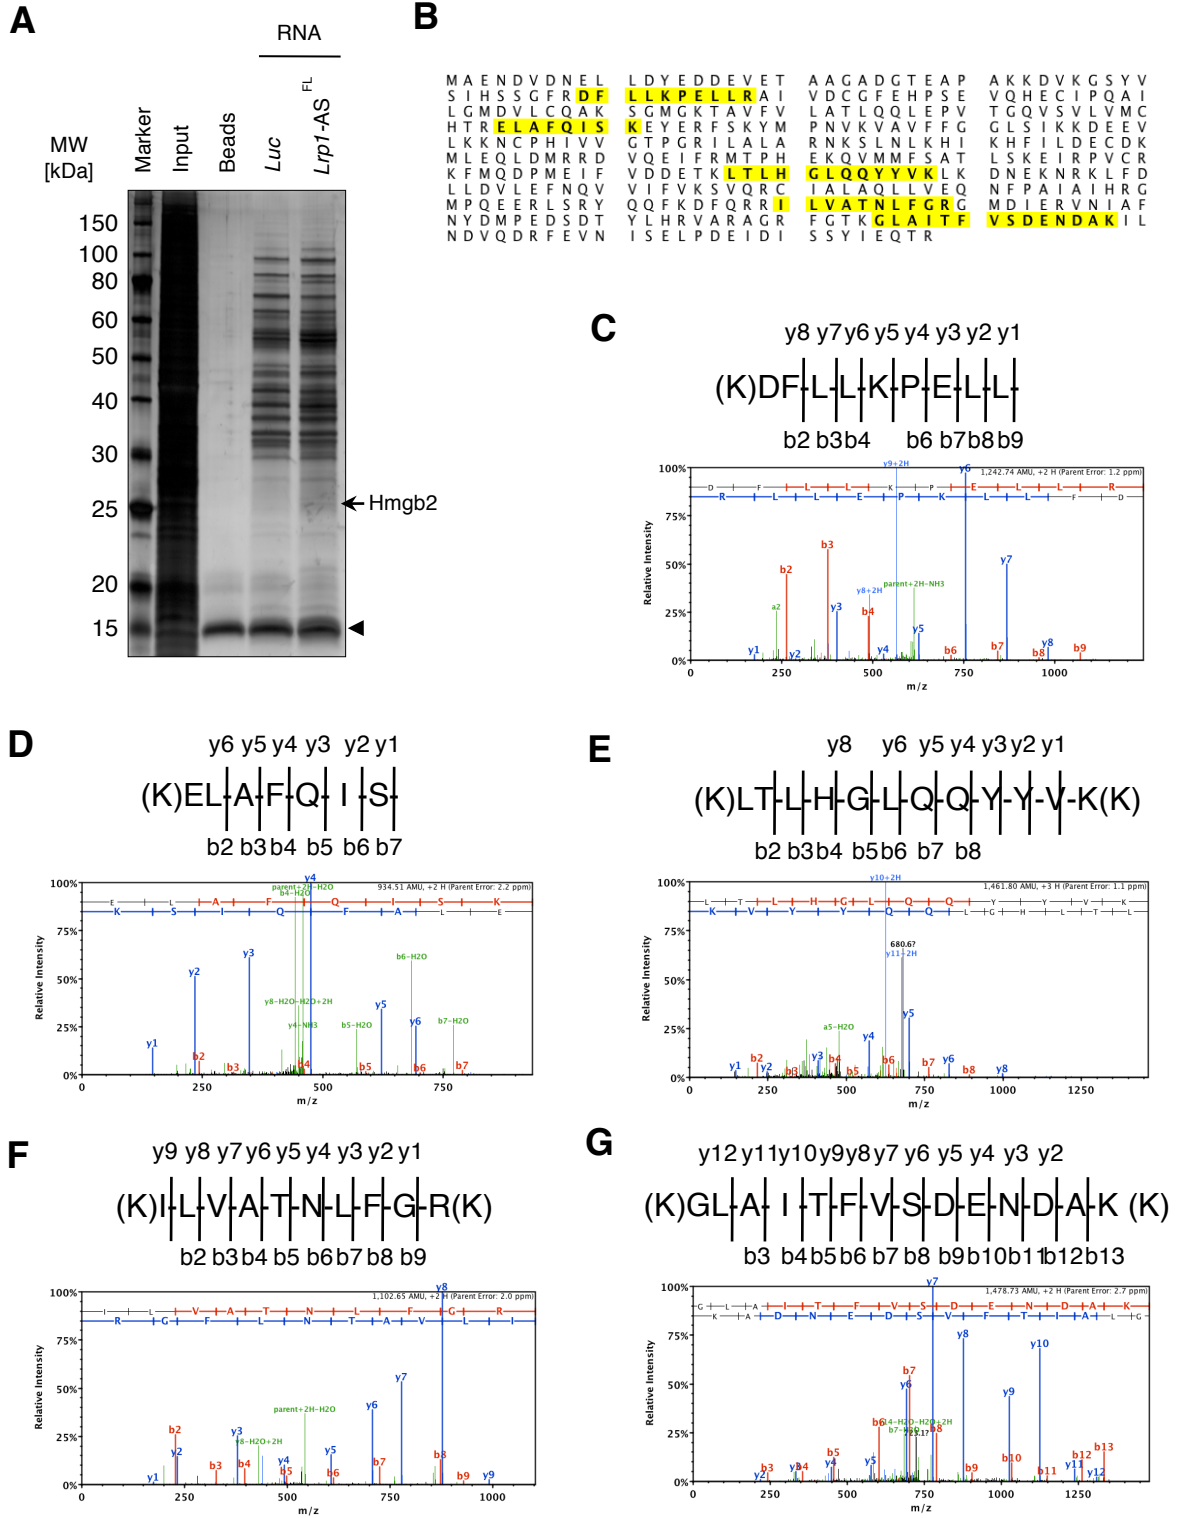

**Figure S3. Identification of Hmgb2 bound to *Lrp1-AS***

(A) RNase-assisted RNA chromatography on full-length *Lrp1-AS* FL in RAW264.7 nuclear extracts, visualized by silver staining (*upper*). Luciferase (*Luc*) RNA chromatogram was used as a negative control. Protein band (*arrow*) corresponds to Hmgb2, which was enriched in the *Lrp1-AS* RNA chromatogram. The *arrowhead* indicates a band corresponding to RNase A/T1/V1.

(B) Mass spectrometry analysis identifies five peptides (highlighted in yellow) in the total protein sequence of Hmgb2

(C-G) Mass spectrum of each peptide shown in (B)



## Figure S4

(Related to Figure 4)

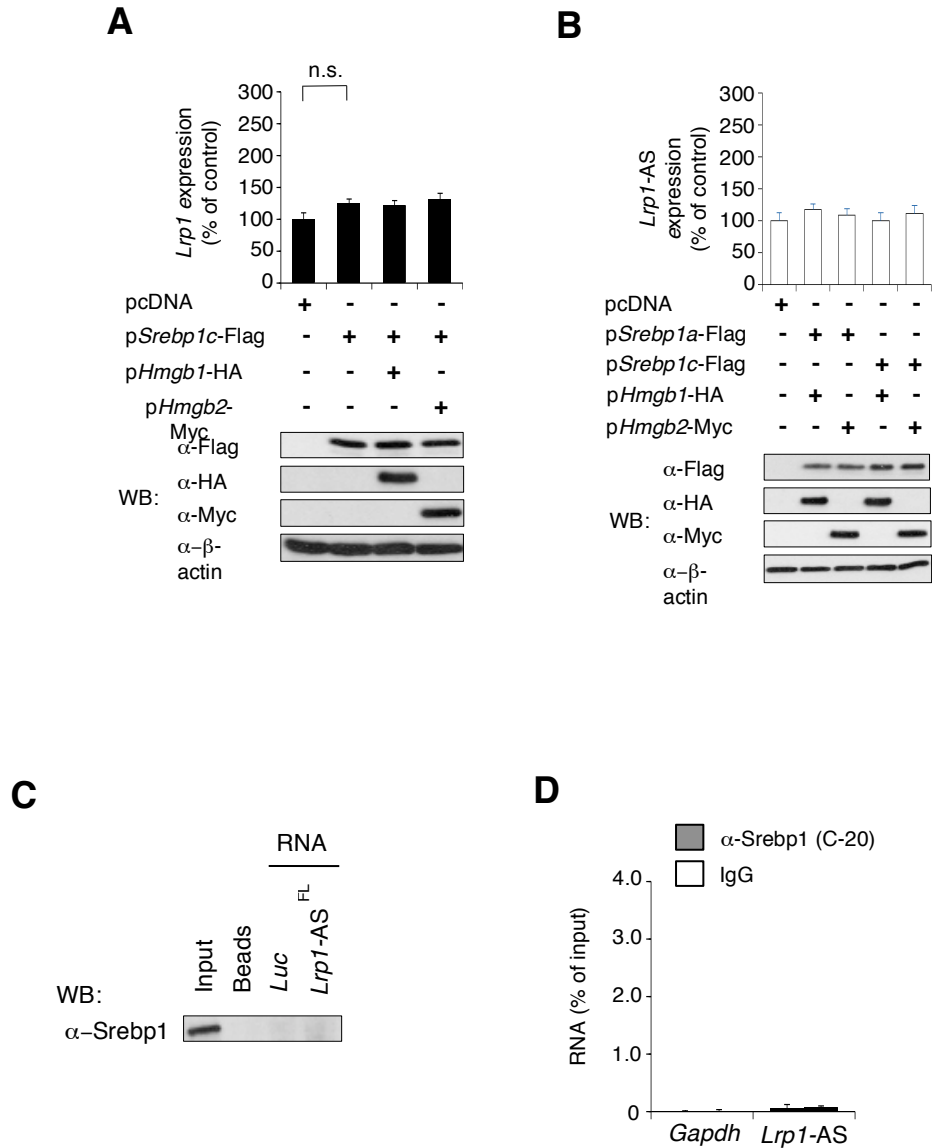

## Figure S4.

(A) *Lrp1* levels after overexpression of mature Srebp1c-Flag and Hmgb1-HA/2-Myc in RAW264.7 cells (*upper*). (B) *Lrp1-AS* levels after overexpression of mature Srebp1a/c-Flag and Hmgb1-HA/2-Myc in RAW264.7 cells (*upper*). Expression of exogenous proteins was monitored by Western Blotting (WB) with the indicated antibodies (*lower*), and an antibody to  $\beta$ -actin was used as

loading control in (A) and (B).

(C) RNase-assisted RNA chromatography on full-length *Lrp1*-AS FL in RAW264.7 nuclear extracts, followed by Western blotting (WB) of the corresponding RNA chromatograms with Srebp1 antibody. (D) RNA Immunoprecipitation with control IgG or specific antibodies against Srebp1 from RAW264.7 lysates. Co-precipitated RNAs were detected by qRT-PCR using primer pairs for *Lrp1*-AS or *Gapdh*.

## Figure S5

(Related to Figure 4)

### A

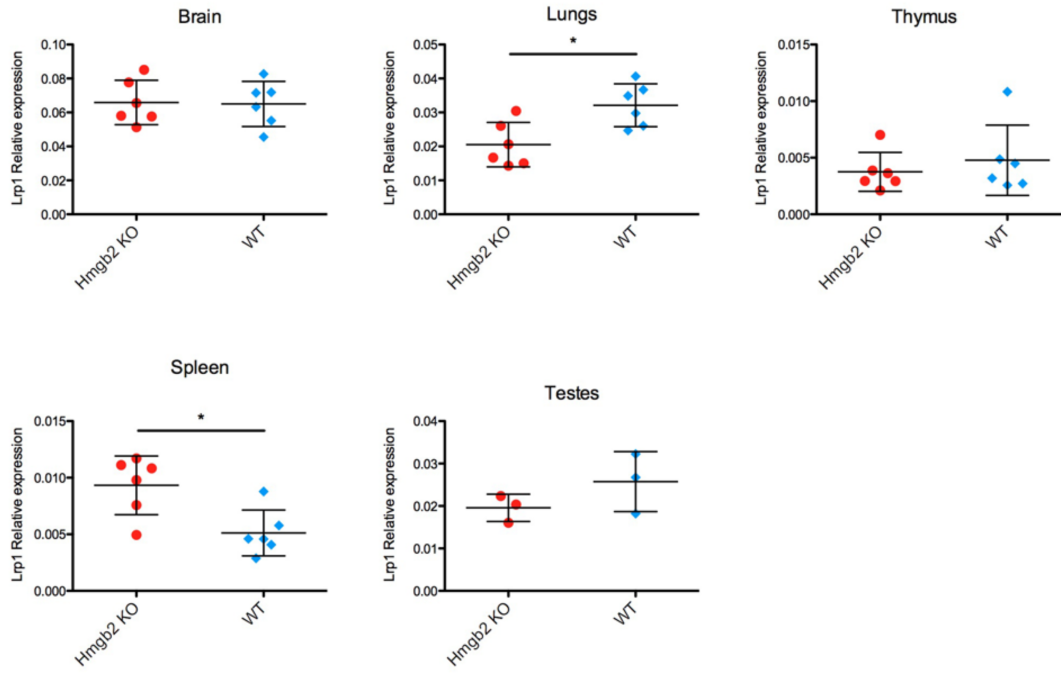

### B

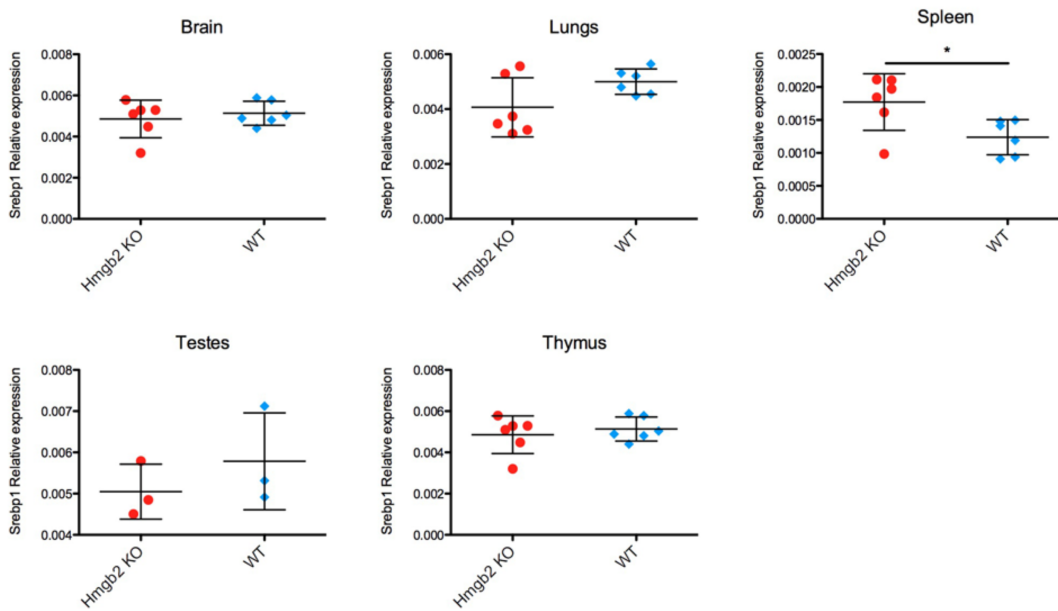

**Figure S5.**

qRT-PCR expression analysis of Lrp1 (A) and Srebp1 (B) expression in Hmgb2 KO and wild type (WT) mice. \*P < 0.05

## Figure S6

(Related to Figure 5)

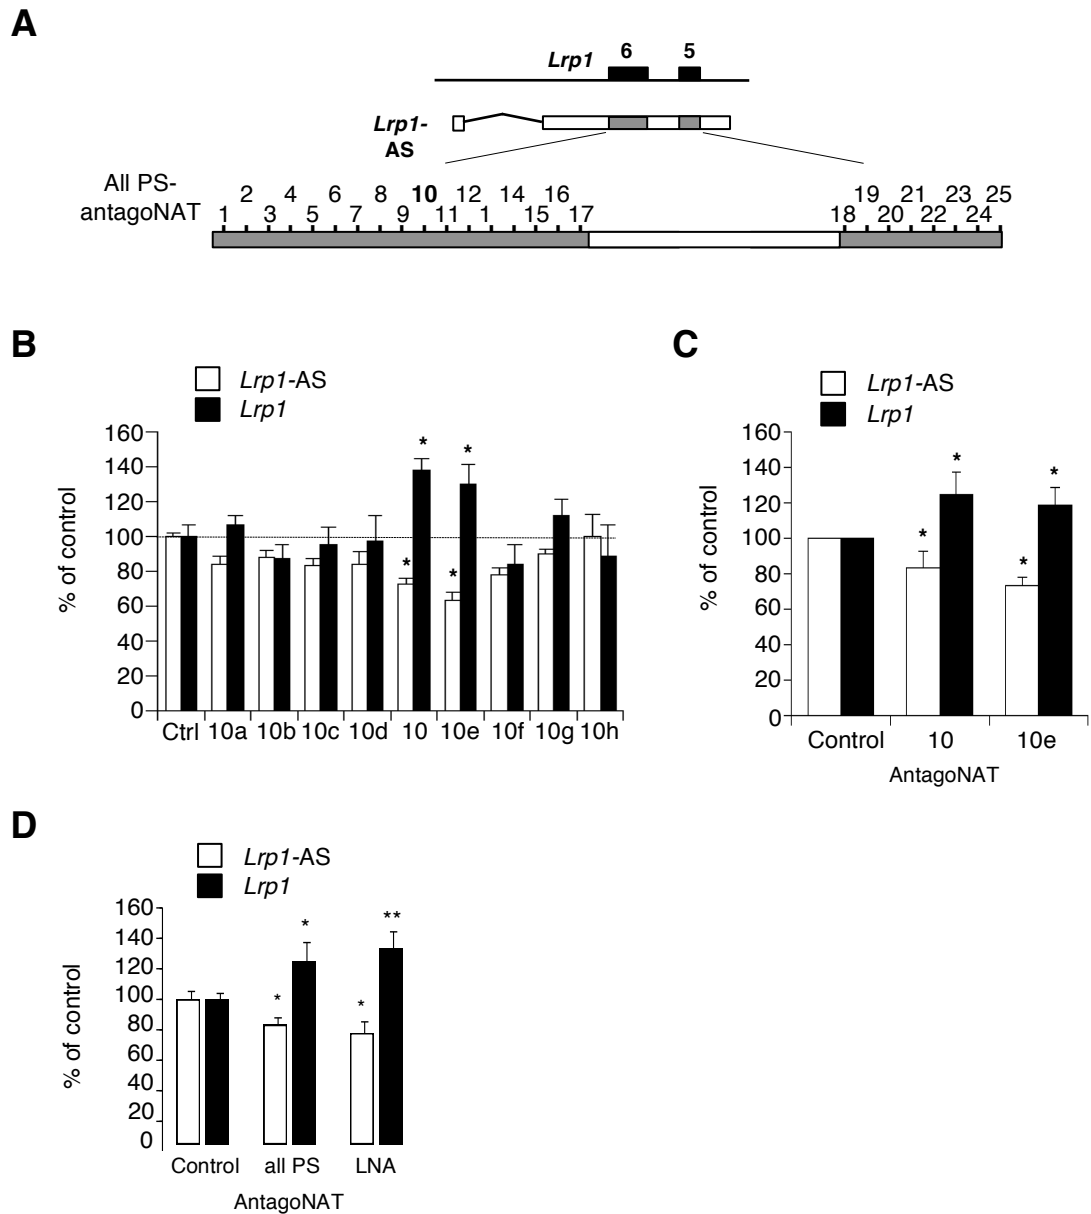

## Figure S6.

(A) Schematic presentation of antagoNATs covering the overlap region of *Lrp1-AS*. (B) *Lrp1* and *Lrp1-AS* levels after transfection of Control or Specific antagoNATs against *Lrp1-AS*, which were adjunct to antagoNAT10. Control

(Ctrl) antagoNAT has a sequence with no homology to any gene. (C) *Lrp1* and *Lrp1*-AS levels after transfection of antagoNAT10 or 10e against *Lrp1*-AS. (D) *Lrp1* and *Lrp1*-AS levels after transfection of either all PS- or locked nucleic acid (LNA)-enhanced antagoNAT10 against *Lrp1*-AS. Mean  $\pm$  s.d. ( $n = 3$  replicates) are shown in all bar graphs. \* $P < 0.05$ , \*\* $P < 0.01$  determined by one-way ANOVA.
